# Supplementary material for: New 1-D and 3-D thiocyanatocadmates modified by various amine molecules and Cl−/CH3COO− ions: synthesis, structural characterization, thermal behavior and photoluminescence properties
Source: Royal Society of Chemistry journal article supplement (doi:10.1039/c4dt03799e), 2015-01-01
Supplement: c4dt03799e1.pdf [file c4dt03799e1.pdf]

## Supporting materials

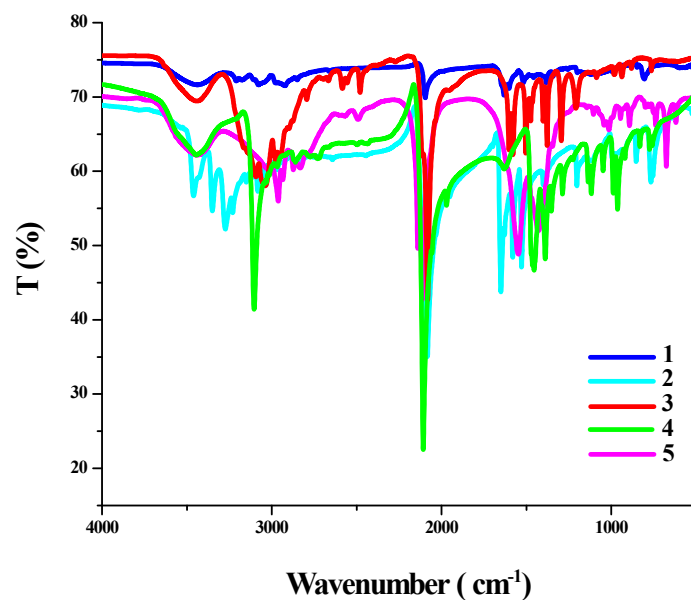

(a)

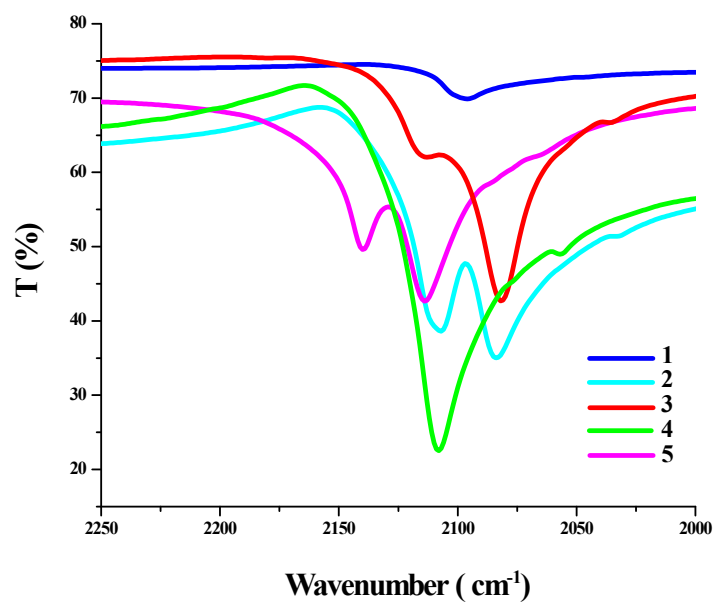

(b)

**Fig. S1** IR spectra of 1-5 in wavenumber ranges of 500-4000  $\text{cm}^{-1}$  (a) and 2000-2250  $\text{cm}^{-1}$  (b).

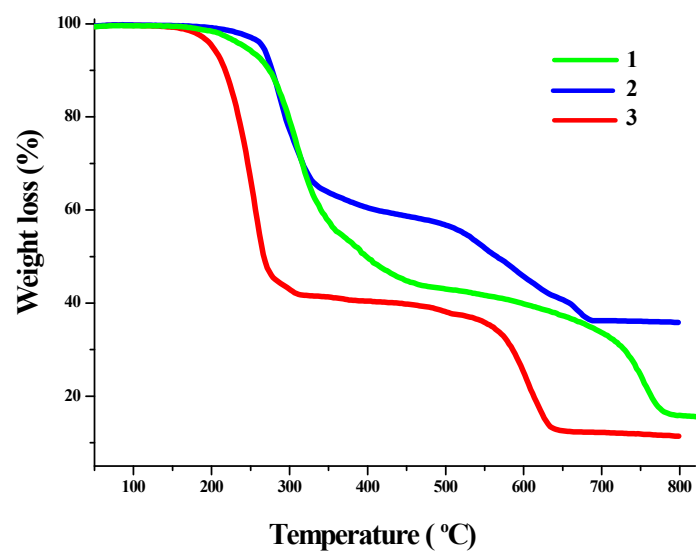

Fig. S2 TG curves of 1-3.

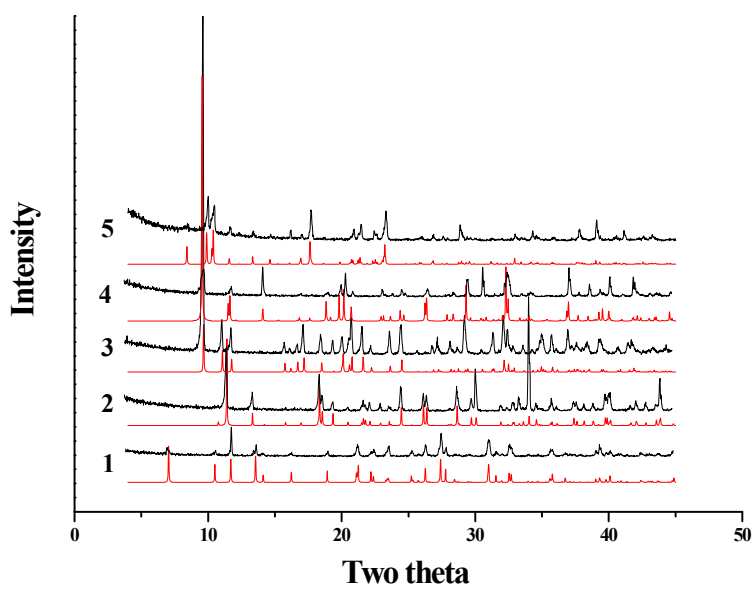

Fig. S3 Simulated (red) and experimental (black) powder XRD patterns of 1-5.

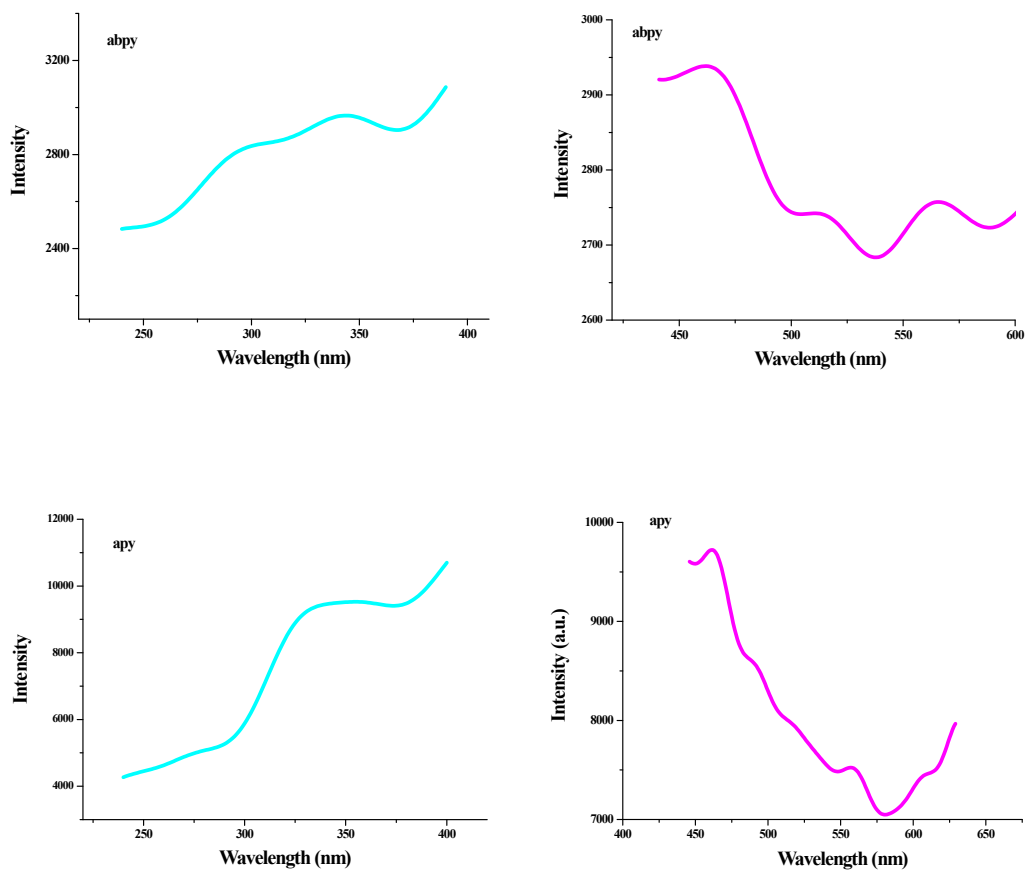

Fig. S4 Excitation (blue) and emission (pink) spectra of abpy and apy.

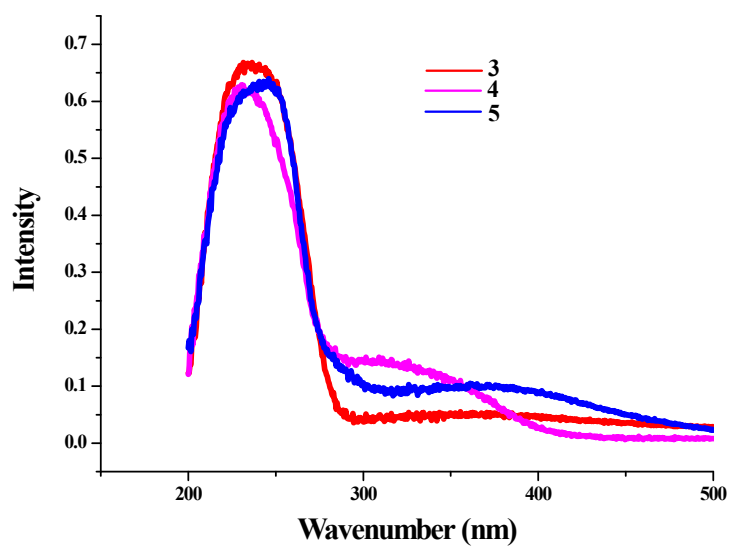

Fig. S5 UV-vis spectra of 3-5.

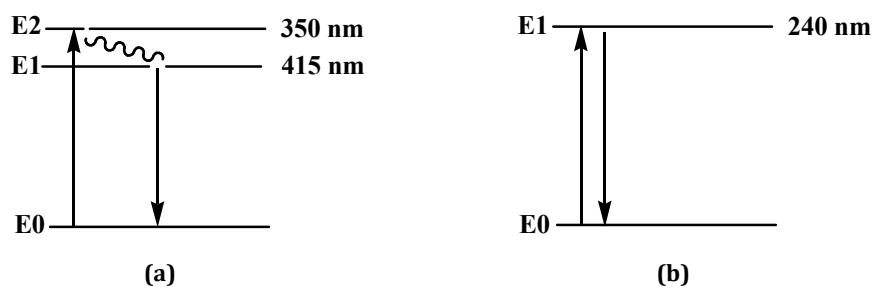

**Fig. S6** Diagrams of energy levels for **1** (a) and **3** (b).
